# Supplementary material for: Intramolecular charge transfer in aminobenzonitriles and tetrafluoro counterparts: fluorescence explained by competition between low lying excited states and radiationless deactivation. Part II: influence of substitution on luminescence patterns
Source: Royal Society of Chemistry journal article supplement (doi:10.1039/c5cp04693a), 2016-01-01

## **Electronic Supporting Information**

Intramolecular charge transfer in aminobenzonitriles and tetrauro counter parts: fluorescence explained by competition between low lying excited states and radiationless deactivation.  
Part II: Influence of substitution on luminescence patterns

Mireia Segado, Yannick Mercier, Isabel Gómez, Mar Reguero

Figure 1.- Schematic representation of the orbitals included in the CAS(12,11).  $R_1=H,CH_3$ ;  $R_2=H,F$ .

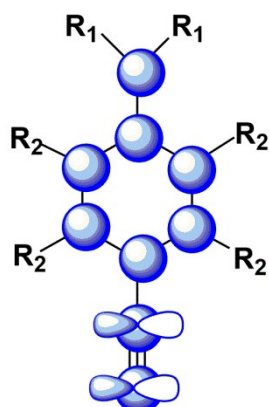

Figure S2.- Geometries and electronic structures (in red) of the ground state, LE, TICT, and RICT minima in DMABN-4F. All bond lengths are in Å.

Values of the second-order exchange density matrix (in italic blue) and the one-electron density matrix (in black) for the same structures.

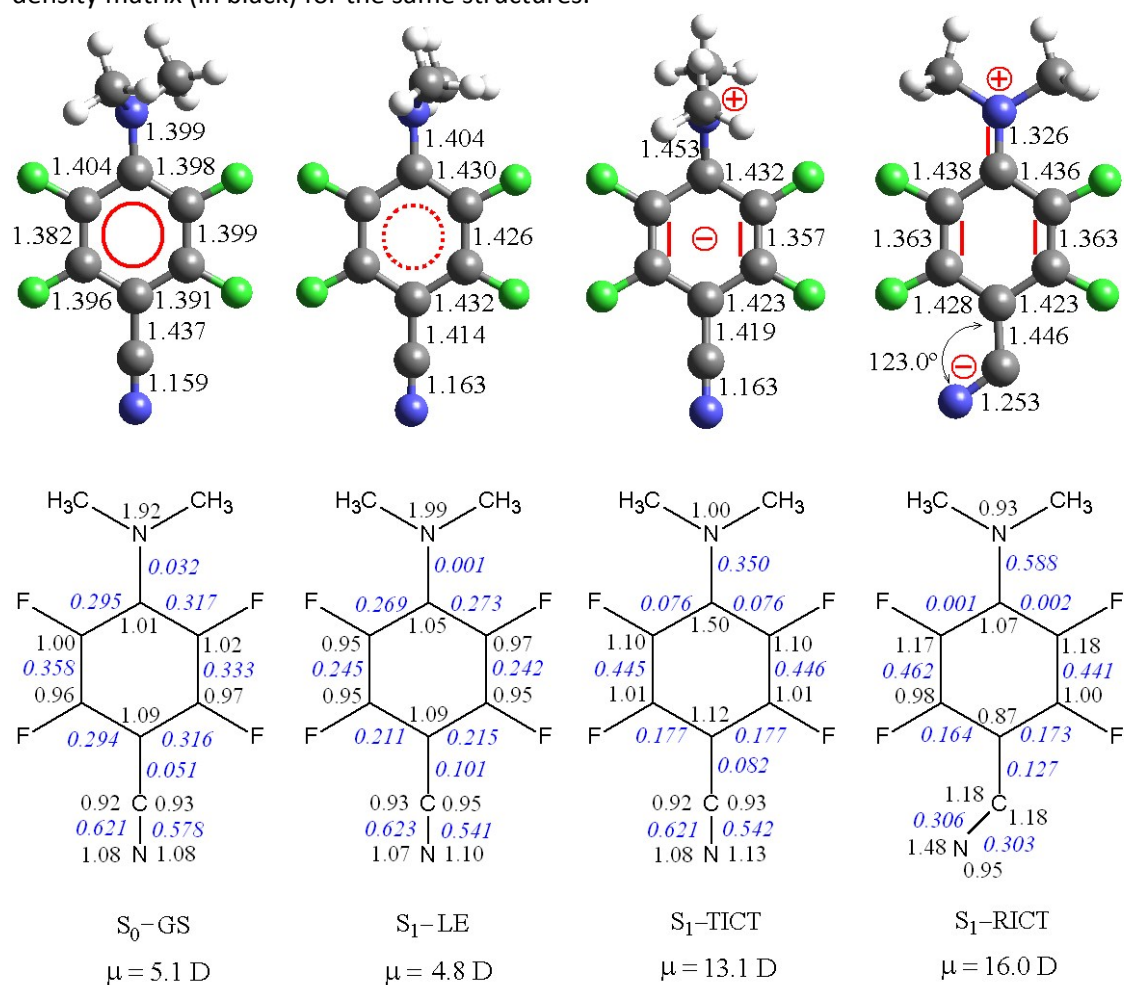

Figure S3. Geometry of the lowest energy excited state minima of ABN, DMABN, ABN-4F and DMABN-4F optimized at the CASSCF(12,11)/6-31G\* level. Bond distances in Å.

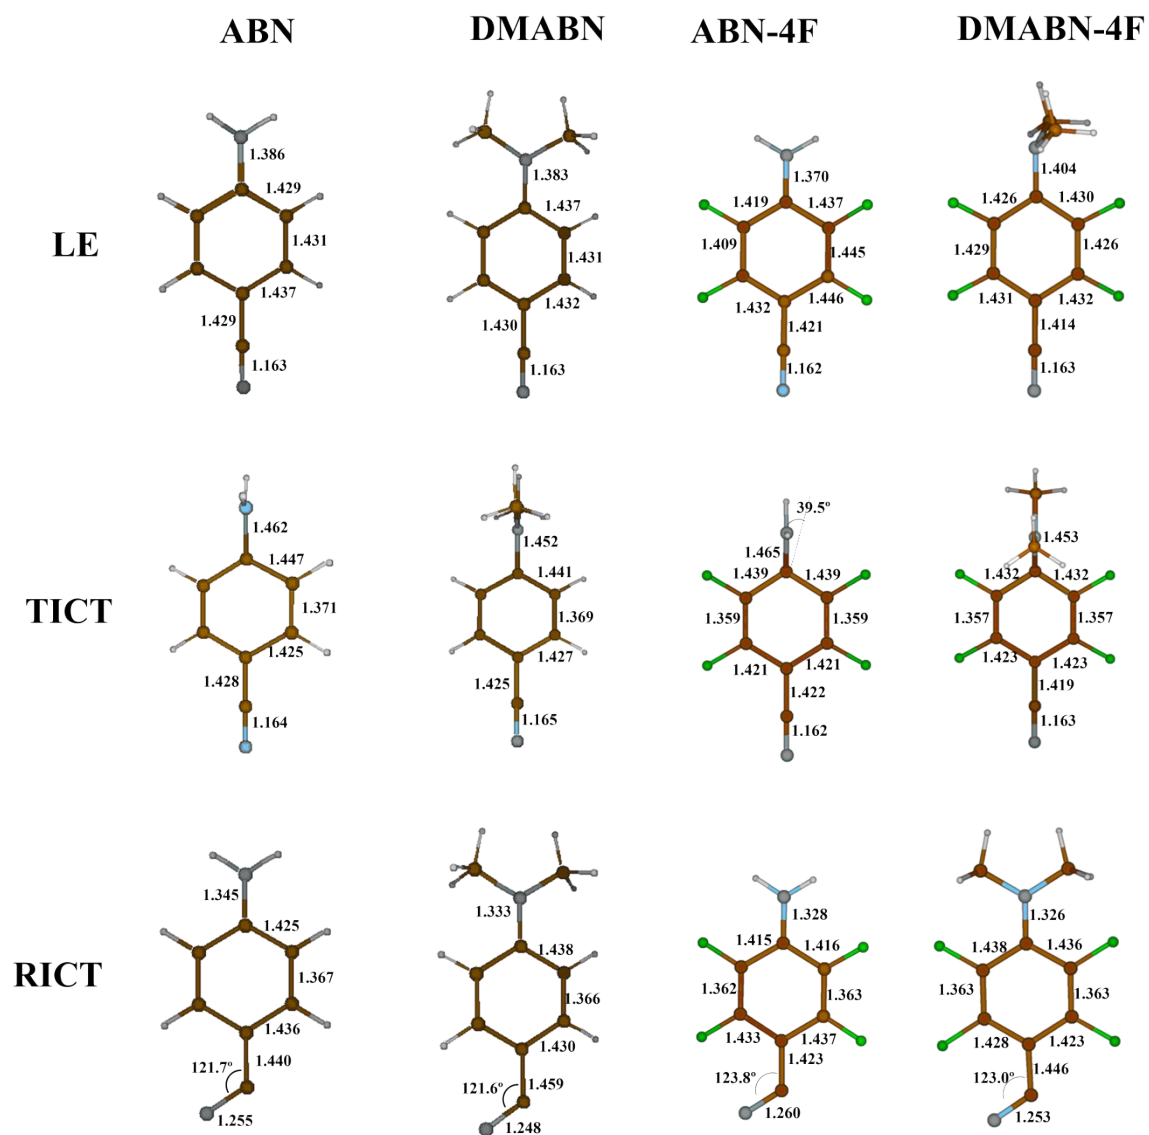

Figure S4.- Geometry of the  $S_3/S_2$  ICT(Q)/ICT(CN) conical intersection for ABN-4F optimized at CASSCF(12,11)/6-31G(d) level.

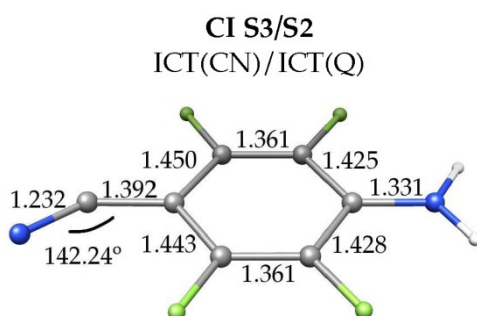

Figure S5.- MS-CASPT2 profiles of the LE and ICT states of ABN-4F along the LIIC path from LE to TICT minima.

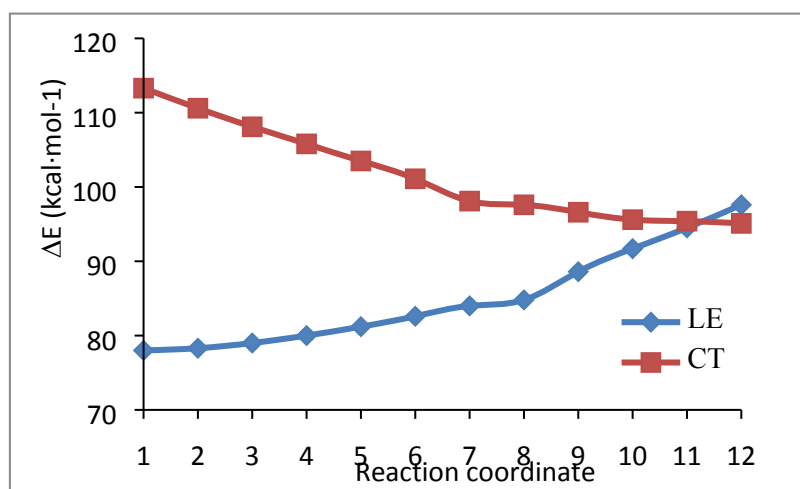

Figure S6.- Geometry of the ICT(Q)/LE ( $S_2/S_1$ ) conical intersection and vectors of the branching space for DMABN-4F: a) derivative coupling; b) gradient difference.

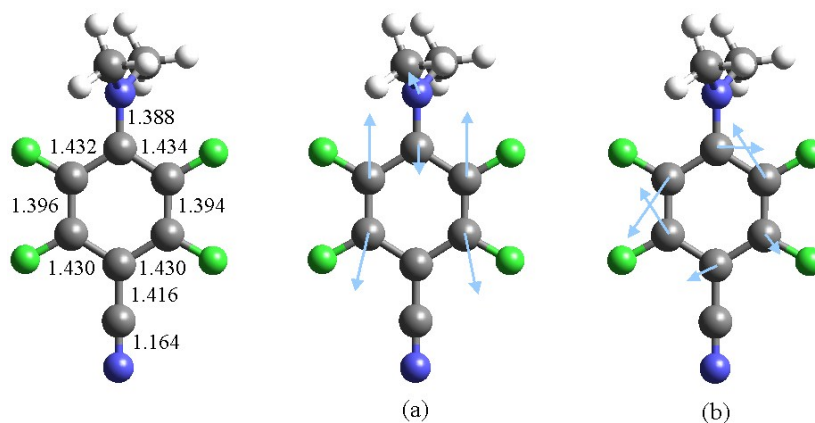

Figure S7.- MS-CASPT2 profiles of the LE and ICT states of DMABN-4F along the LIIC path from FC to the LE minimum

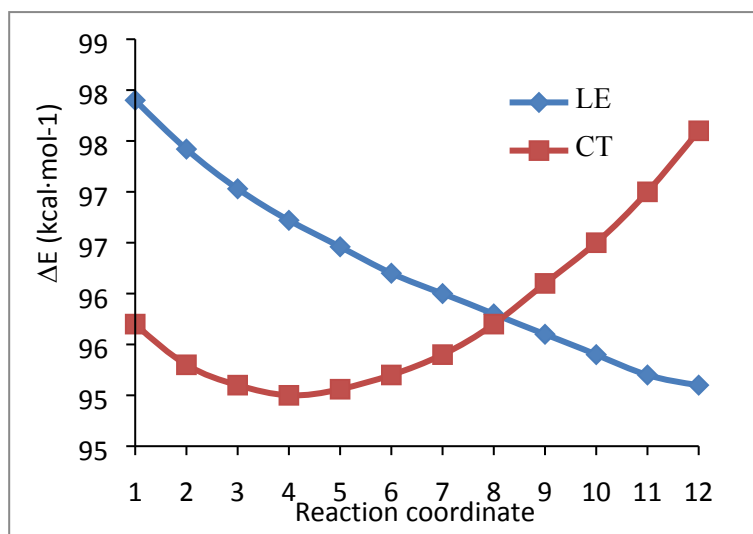

Fig S8.- Geometries of the  $S_1/S_0$  conical intersections located for ABN-4F at CASSCF level.

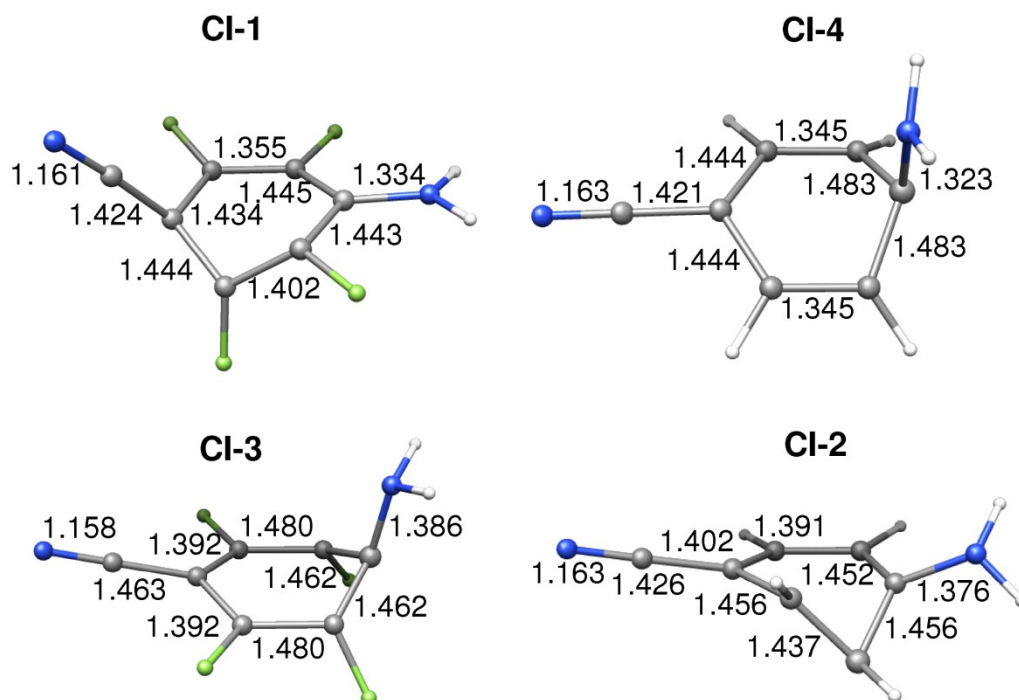

Figure S9.- MS-CASPT2 profiles of the LE and ground state potential energy surfaces of ABN-4F along LIIC path from the LE minima to different  $S_1/S_0$  conical intersections: a) LE/GS CI-1; b) LE/GS CI-2; c) LE/GS CI-3.

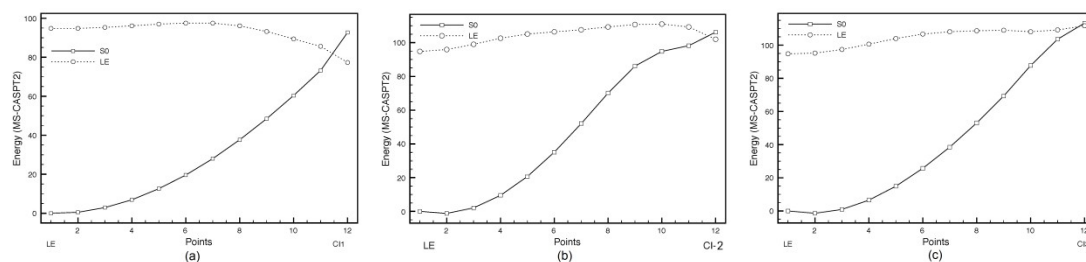

Figure S10.- Geometries of the  $S_1/S_0$  conical intersections located for DMABN and DMABN-4F at CASSCF level: a) LE/GS CI in DMABN; b) LE/GS CI in DMABN-4F; c) CT/GS CI in DMABN; d) TS to CT/GS CI in DMABN.

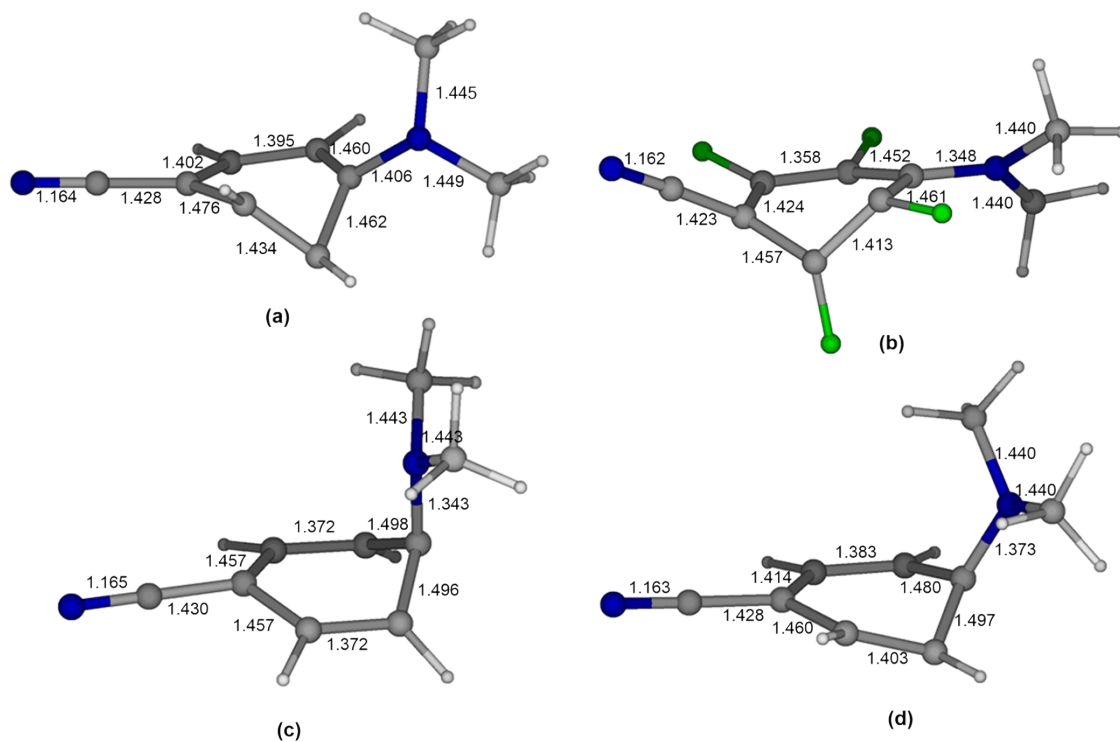

Supplement: c5cp04693a1.pdf [file c5cp04693a1.pdf]
